# Supplementary material for: Suitability of Different Mapping Algorithms for Genome-Wide Polymorphism Scans with Pool-Seq Data
Source: PubMed Central journal article supplement (PMC5100849; doi:10.1534/g3.116.034488), 2016-09-09
Supplement: supp_g3.116.034488_TableS4.pdf [file supp_g3.116.034488_TableS4.pdf]

Table 4: Comparison of allele frequency differences between simulated Pool-Seq data sets with different mapping algorithms. We simulated different paired end Pool-Seq libraries, mapped the reads and compared the allele frequencies between the libraries using  $F_{ST}$ . With this procedure we evaluated the sensitivity of the alignment algorithm to differences in the distance between paired ends (id), differences in the read length (rl) and differences in the error rates (e). As all libraries were derived from identical template sequences (templates with SNPs and indels) no significant allele frequency differences were expected ( $F_{ST} = 0$ ). We estimated the number of true positive SNPs for which allele frequencies could be compared (TP) and the lowest  $F_{ST}$ -values in the 0.1% and 10% quantiles with the most differentiated SNPs. id100, rl100, e1%: 2x100bp paired ends, insert size  $100 \pm 20$ bp, error rate 1%; id300: 2x100bp paired ends, insert size  $300 \pm 60$ bp, error rate 1%; rl50: 2x50bp paired ends, insert size  $100 \pm 20$ bp, error rate 1%; e5%: 2x100bp paired ends, insert size  $100 \pm 20$ bp, error rate 5%

| algorithm    | id100 vs. id300 |       |       | rl100 vs. rl50 |       |       | e1% vs. e5% |       |       |
|--------------|-----------------|-------|-------|----------------|-------|-------|-------------|-------|-------|
|              | TP              | 10%   | 0.1%  | TP             | 10%   | 0.1%  | TP          | 10%   | 0.1%  |
| bowtie2(g)   | 12468           | 0.021 | 0.358 | 12474          | 0.027 | 0.351 | 11778       | 0.251 | 0.476 |
| bwa aln      | 14128           | 0.008 | 0.334 | 14106          | 0.014 | 0.279 | 14860       | 0.078 | 0.486 |
| clc4(g)      | 12415           | 0.006 | 0.286 | 11067          | 0.008 | 0.201 | 12664       | 0.004 | 0.115 |
| mrfast       | 10752           | 0.019 | 0.46  | 9712           | 0.055 | 0.500 | 11704       | 0.212 | 0.603 |
| ngm(g)       | 8463            | 0.006 | 0.143 | 7122           | 0.030 | 0.468 | 7878        | 0.017 | 0.175 |
| novoalign(g) | 16093           | 0.004 | 0.289 | 15263          | 0.007 | 0.232 | 16415       | 0.003 | 0.081 |
| segemehl     | 14097           | 0.005 | 0.223 | 13394          | 0.010 | 0.216 | 11550       | 0.011 | 0.136 |
| bowtie2(l)   | 11158           | 0.031 | 0.359 | 11280          | 0.039 | 0.301 | 10663       | 0.024 | 0.668 |
| bwa bwasw    | 13694           | 0.016 | 0.363 | 11433          | 0.262 | 0.456 | 13661       | 0.020 | 0.215 |
| bwa mem      | 15990           | 0.005 | 0.290 | 15104          | 0.007 | 0.156 | 16288       | 0.004 | 0.075 |
| clc4(l)      | 12415           | 0.006 | 0.286 | 11067          | 0.008 | 0.201 | 12664       | 0.004 | 0.115 |
| gsnap        | 16363           | 0.007 | 0.231 | 12350          | 0.041 | 0.385 | 13615       | 0.044 | 0.372 |
| ngm(l)       | 9665            | 0.006 | 0.142 | 9110           | 0.026 | 0.453 | 9079        | 0.018 | 0.167 |
| novoalign(l) | 16057           | 0.005 | 0.279 | 15191          | 0.009 | 0.243 | 16381       | 0.003 | 0.081 |
